# Supplementary material for: Electronic cigarettes versus nicotine patches for smoking cessation in pregnancy: a randomized controlled trial
Source: Springer Nature journal article supplement (doi:10.1038/s41591-022-01808-0), 2022-05-01
Supplement: MOESM1 [file 41591_2022_1808_MOESM1_ESM.pdf]

**Supplementary information**

---

**Electronic cigarettes versus nicotine patches for smoking cessation in pregnancy: a randomized controlled trial**

---

In the format provided by the authors and unedited

## Supplementary tables

**Supplementary Table 1: Use of non-allocated products in the two study arms**

|                                                                                                     | <b>E-cigarettes<br/>(571)</b> | <b>NRT<br/>(569)</b> |
|-----------------------------------------------------------------------------------------------------|-------------------------------|----------------------|
| Use of non-allocated product, N (%)                                                                 | 16 (2.8%)                     | 101 (17.8%)          |
| Users of non-allocated product among validated abstainers at EOP, N (% of abstainers)               | 0 (0%)                        | 5 (20.0%)            |
| Users of non-allocated product among self-reported sustained abstainers at EOP, N (% of abstainers) | 2 (3.2%)                      | 13 (29.5%)           |
| Users of non-allocated product among self-reported 7-day abstainers at EOP, N (% of abstainers)     | 6 (5.1%)                      | 25 (32.1%)           |

EOP=end of pregnancy

**Supplementary Table 2. Smoking reduction in non-abstainers**

|                                                                 | <b>E-<br/>cigarettes<br/>(N=453)</b> | <b>NRT<br/>(N=491)</b> | <b>RR (95%CI)<sup>#</sup></b>                |
|-----------------------------------------------------------------|--------------------------------------|------------------------|----------------------------------------------|
| Validated* 50% reduction at EOP                                 | 12 (2.7)                             | 12 (2.4)               | 1.08 (0.49-2.39)<br>p=0.84                   |
| <i>Sensitivity analysis</i>                                     |                                      |                        |                                              |
| Reducers using non-allocated product excluded (N=453 and N=489) | 12 (2.7)                             | 10 (2.0)               | 1.30 (0.57-2.97)<br>p=0.54                   |
| Self-reported 50% reduction at EoP                              | 192 (42.4)                           | 166 (33.8)             | <b>1.25 (1.06- 1.48)</b><br><b>p=0.007</b>   |
| <i>Sensitivity analysis</i>                                     |                                      |                        |                                              |
| Reducers using non-allocated product excluded (N=448 and N=450) | 187 (41.7)                           | 125 (27.8)             | <b>1.50 (1.25-1.81)</b><br><b>p&lt;0.001</b> |

\* 50+% reduction in cotinine levels compared to baseline.

# Relative risks obtained using a binomial regression with a logarithmic link with two-sided p-values

EOP=end of pregnancy

**Supplementary Table 3. E-cigarettes use in the e-cigarettes arm**

|                                                                                       |                           |            |
|---------------------------------------------------------------------------------------|---------------------------|------------|
| <b><i>Products used during the initial 4 weeks (n=344)<sup>#</sup> *</i></b><br>N (%) | Refillable e-cigarettes   | 324 (94.2) |
|                                                                                       | Cig-a-like                | 1 (0.3)    |
|                                                                                       | Cartridge/Pod             | 1 (0.3)    |
|                                                                                       | Information missing       | 18 (5.2)   |
| <i>Nicotine strength</i><br>N (%)                                                     | 0 mg/mL                   | 7 (2.0)    |
|                                                                                       | 1-10mg/mL                 | 47 (13.7)  |
|                                                                                       | 11-20mg/mL                | 199 (57.9) |
|                                                                                       | Information missing       | 91 (26.5)  |
| <i>Flavour</i><br>N (%)                                                               | Fruit                     | 180 (52.3) |
|                                                                                       | Tobacco                   | 24 (7.0)   |
|                                                                                       | Mint/menthol              | 22 (6.4)   |
|                                                                                       | Chocolate, dessert, candy | 11 (3.2)   |
|                                                                                       | Other                     | 21 (6.1)   |
|                                                                                       | Information missing       | 86 (25.0)  |
| <b><i>Products used since last contact at EOP (N=371)</i></b><br>N (%)                | Refillable e-cigarettes   | 330 (89.0) |
|                                                                                       | Cig-a-like                | 0 (0)      |
|                                                                                       | Cartridge/Pod             | 2 (0.5)    |
|                                                                                       | Information missing       | 39 (10.5)  |
| <i>Nicotine strength</i><br>N (%)                                                     | 0 mg/ml                   | 8 (2.2)    |
|                                                                                       | 1-10mg/ml                 | 77 (20.8)  |
|                                                                                       | 11-20mg/ml                | 61 (16.4)  |
|                                                                                       | Information missing       | 225 (60.7) |
| <i>Flavour</i><br>N (%)                                                               | Fruit                     | 97 (26.2)  |
|                                                                                       | Mint/menthol              | 38 (10.2)  |
|                                                                                       | Chocolate, dessert, candy | 19 (5.1)   |
|                                                                                       | Tobacco                   | 17 (4.6)   |
|                                                                                       | Other                     | 24 (6.5)   |
|                                                                                       | Information missing       | 176 (47.4) |

<sup>#</sup>Participants were coded as having used e-cigarettes if they reported any use during at least one of the weeks; while at end of pregnancy if they reported having used their allocated product since the last call.

\* If several products were used, only the last product used is listed  
EOP=end of pregnancy

**Supplementary Table 4: Birth outcomes by study arms, including twin births (9 in e-cigarette arm and 4 in NRT arm)**

|                                                                     | E-cigarettes<br>(N=564) <sup>^</sup> | NRT<br>(N=557) <sup>^</sup> | RR (95% CI) <sup>**</sup>                |
|---------------------------------------------------------------------|--------------------------------------|-----------------------------|------------------------------------------|
| Miscarriage N (%)                                                   | 3 (0.5)                              | 3 (0.5)                     | 0.99 (0.20-4.87)<br>p=0.99               |
| Stillbirth N (%)                                                    | 2 (0.4)                              | 0 (0)                       | N/C <sup>\$</sup>                        |
| Neonatal death N (%)                                                | 2 (0.4)                              | 3 (0.5)                     | 0.66 (0.11–3.93)<br>p=0.65               |
| Post-neonatal death N (%)                                           | 0                                    | 3 (0.5)                     | N/C <sup>\$</sup>                        |
| Maternal death N (%)                                                | 0                                    | 0                           | N/C <sup>\$</sup>                        |
| Preterm birth N (%)                                                 | 56 (9.9)                             | 69 (12.4)                   | 0.80 (0.56-1.14)<br>p=0.22               |
| Low birthweight N (%)<br>N: 558 vs. 549                             | 63 (11.3)                            | 86 (15.7)                   | <b>0.72 (0.53-0.99)</b><br><b>p=0.04</b> |
| NICU admission N (%)                                                | 58 (10.3)                            | 46 (8.3)                    | 1.25 (0.85-1.81)<br>p=0.25               |
| Congenital abnormalities N (%) <sup>#</sup>                         | 26 (4.6)                             | 15 (2.7)                    | 1.71 (0.92-3.20)<br>p=0.09               |
| Terminations N (%)<br>-Due to congenital abnormalities              | 1 (0.2)                              | 2 (0.4)                     | 1.48 (0.25–8.84)<br>p=0.67               |
| -Due to premature rupture of membranes                              | 2 (0.4)                              | 0                           | N/C <sup>\$</sup>                        |
| Total number of adverse birth outcomes                              | 213                                  | 227                         |                                          |
| Number of women with adverse birth outcomes N (%)<br>(N=555 vs 553) | 120 (21.6)                           | 122 (22.1)                  | 0.98 (0.78-1.22)<br>p=0.86               |
| Delivery by cesarean section N (%)                                  | 145 (25.7)                           | 152 (27.2)                  | 0.94 (0.77-1.15)<br>p=0.56               |
| Gestational age – weeks Mean (SD) N: 562 vs. 555                    | 38.3 (3.1)                           | 38.2 (3.1)                  | 0.12 (-0.25-0.49)*<br>p=0.52             |
| Birthweight in kg Mean (SD) N: 558 vs. 549                          | (0.63)                               | 3.1 (0.63)                  | 0.01 (-0.07-0.08)*<br>p=0.86             |

<sup>^</sup> Number of babies

<sup>#</sup> 2 infants in the e-cigarettes arm and 1 in the NRT arm had 2 congenital abnormalities

<sup>\$</sup> Not calculated

\* Mean difference (95% CIs)

\*\* Relative risks obtained using a binomial regression with a logarithmic link with two-sided p-values

**Supplementary Table 5: Other serious adverse events (SAEs), adverse events (AEs) and adverse reactions (ARs)**

| <b>Event</b>                       | <b>E-<br/>cigarettes</b> | <b>NRT</b> |
|------------------------------------|--------------------------|------------|
| <i>Other SAEs mother</i>           |                          |            |
| Premature rupture of the membranes | 5                        | 5          |
| Pre-eclampsia                      | 3                        | 3          |
| Threatened labour                  | 3                        | 3          |
| Vaginal haemorrhage                | 2                        | 4          |
| Genitourinary tract infection      | 0                        | 4          |
| Haemorrhage in pregnancy           | 2                        | 2          |
| Abdominal pain                     | 2                        | 1          |
| Migraine                           | 1                        | 2          |
| Premature labour                   | 1                        | 2          |
| Other (see list)                   | 18                       | 21         |
| <i>Other SAEs baby</i>             |                          |            |
| Newborn Respiratory Disorders      | 9                        | 7          |
| Jaundice                           | 3                        | 2          |
| Vomiting                           | 2                        | 2          |
| Meconium aspiration syndrome       | 3                        | 1          |
| Drug withdrawal syndrome           | 3                        | 1          |
| Sepsis neonatal                    | 4                        | 0          |
| Hypoglycemia neonatal              | 3                        | 0          |
| Tonsillitis                        | 2                        | 1          |
| Foetal growth restriction          | 1                        | 2          |
| Other (see list)                   | 20                       | 20         |
| <i>AEs mother</i>                  |                          |            |
| Nasopharyngitis                    | 25                       | 17         |
| Lower respiratory tract infection  | 15                       | 9          |
| Nausea                             | 12                       | 11         |
| Headache                           | 11                       | 9          |
| Cough                              | 8                        | 8          |
| Gestational diabetes               | 6                        | 11         |
| Influenza like illness             | 7                        | 6          |
| Migraine                           | 2                        | 7          |
| Urinary tract infection            | 3                        | 5          |
| Abortion induced                   | 4                        | 2          |
| Perinatal depression               | 4                        | 2          |
| Vaginal hemorrhage                 | 4                        | 2          |
| Asthma                             | 2                        | 3          |
| Oropharyngeal pain                 | 1                        | 4          |
| Vomiting                           | 3                        | 2          |
| Hypertension                       | 0                        | 4          |
| Viral infection                    | 2                        | 2          |
| Abdominal pain upper               | 3                        | 1          |
| Depression                         | 1                        | 2          |

|                                                                       |         |          |
|-----------------------------------------------------------------------|---------|----------|
| Dyspepsia                                                             | 1       | 2        |
| Hypotension                                                           | 1       | 2        |
| Other                                                                 | 48      | 35       |
| <i>AEs baby</i>                                                       |         |          |
| Foetal Growth Restrictions                                            | 1       | 2        |
| Other                                                                 | 4       | 8        |
| Total number of other mother/infant SAEs and AEs<br>N (%)             | 255     | 239      |
| Number of participants with other SAEs and AEs N (%)                  | 181     | 162      |
| <i>ARs potentially related to treatment</i>                           |         |          |
| Application site irritation, hypoesthesia ,rash, pain, or<br>pruritus | 0<br>17 | 81<br>36 |
| Nausea                                                                | 42      | 0        |
| Cough                                                                 | 39      | 0        |
| Oropharyngeal pain or irritation                                      | 0       | 14       |
| Rash                                                                  | 4       | 9        |
| Headache                                                              | 1       | 8        |
| Dizziness                                                             | 11      | 0        |
| Chest pain or discomfort                                              | 1       | 3        |
| Vomiting                                                              | 3       | 0        |
| Dyspnea                                                               | 1       | 2        |
| Migraine                                                              | 0       | 3        |
| Myalgia                                                               | 7       | 6        |
| Other (see list)                                                      |         |          |
| Total number of ARs                                                   | 126     | 162      |
| Number of participants with ARs *                                     | 108     | 148      |
| <i>Action following ARs**</i>                                         |         |          |
| Study drug discontinuation/interruption following AR                  | 36      | 111      |
| Study drug dose change following AR                                   | 41      | 12       |

\* RR=0.86, 95%CI: 0.74-1.01

\*\* Chi<sup>2</sup>(1)=46.0, p<.001 (two-sided p-value)

Note: Cases of conditions that led to hospitalization are listed under SAEs while those that did not are considered AEs. The same condition (e.g. foetal growth restriction) may thus appear under different headings.

**Supplementary Table 6: SAE and AE that occurred only once or twice**

| <b>Event</b>                            | <b>E-<br/>cigarettes</b> | <b>NRT</b> |
|-----------------------------------------|--------------------------|------------|
| <b>Other SAEs mother</b>                |                          |            |
| Abdominal pain upper                    | 1                        | 0          |
| Acute myocardial infarction             | 1                        | 0          |
| Alcoholism                              | 1                        | 0          |
| Cellulitis                              | 0                        | 1          |
| Cerebral haemorrhage                    | 1                        | 0          |
| Cervix inflammation                     | 0                        | 1          |
| Dehydration                             | 1                        | 0          |
| Diarrhoea                               | 0                        | 1          |
| Eclampsia                               | 0                        | 1          |
| Endometritis decidual                   | 0                        | 1          |
| Epilepsy                                | 1                        | 1          |
| Gastritis                               | 0                        | 1          |
| Gestational diabetes                    | 0                        | 1          |
| Haemoglobin decreased                   | 0                        | 1          |
| Hyperemesis gravidarum                  | 0                        | 1          |
| Influenza                               | 1                        | 1          |
| Kidney infection                        | 1                        | 0          |
| Lower respiratory tract infection       | 0                        | 1          |
| Mastitis                                | 1                        | 0          |
| Nephrolithiasis                         | 1                        | 0          |
| Pneumonia                               | 1                        | 1          |
| Postpartum haemorrhage                  | 1                        | 0          |
| Premature separation of placenta        | 0                        | 1          |
| Preterm premature rupture of membranes  | 0                        | 1          |
| Puerperal pyrexia                       | 1                        | 0          |
| Pulmonary thrombosis                    | 0                        | 1          |
| Pyelonephritis acute                    | 0                        | 1          |
| Renal pain                              | 1                        | 0          |
| Retained products of conception         | 0                        | 1          |
| Sciatica                                | 1                        | 0          |
| Sepsis                                  | 1                        | 1          |
| Tooth infection                         | 0                        | 1          |
| Upper respiratory tract infection       | 0                        | 1          |
| Ureteric injury                         | 1                        | 0          |
| Wound infection                         | 1                        | 0          |
| <i>Other SAEs baby</i>                  |                          |            |
| Abdominal distension                    | 1                        | 0          |
| Asthma                                  | 1                        | 0          |
| Benign Neonatal Sleep Myoclonus         | 0                        | 1          |
| Beta haemolytic streptococcal infection | 1                        | 0          |
| Bradycardia                             | 1                        | 0          |
| Bronchiolitis                           | 0                        | 1          |

|                                       |   |   |
|---------------------------------------|---|---|
| Bronchitis                            | 0 | 1 |
| Cardiac arrest neonatal               | 0 | 1 |
| Cholecystectomy                       | 0 | 1 |
| Foetal cardiac arrest                 | 1 | 0 |
| Foetal hypokinesia (1)                | 1 | 1 |
| Haematoma                             | 0 | 1 |
| Hospitalisation for further diagnosis | 1 | 0 |
| Hypertonia neonatal                   | 0 | 1 |
| Hypothermia neonatal                  | 1 | 1 |
| Hypoxic-ischaemic encephalopathy      | 1 | 0 |
| Immune thrombocytopenia               | 1 | 0 |
| Infantile apnoea                      | 1 | 1 |
| Intraventricular haemorrhage neonatal | 0 | 1 |
| Low birthweight baby                  | 1 | 1 |
| Necrotising enterocolitis neonatal    | 1 | 0 |
| Neonatal infection                    | 1 | 1 |
| Neonatal pneumothorax                 | 0 | 1 |
| Neonatal seizure                      | 2 | 0 |
| Perinatal stroke                      | 0 | 1 |
| Poor feeding infant                   | 0 | 1 |
| Poor weight gain neonatal             | 0 | 1 |
| Shoulder dystocia                     | 0 | 1 |
| Skin discolouration                   | 1 | 0 |
| Skull fracture                        | 0 | 1 |
| Spinal cord neoplasm                  | 1 | 0 |
| Viral infection                       | 2 | 0 |
| <b>AEs mother</b>                     |   |   |
| Abdominal pain                        | 0 | 2 |
| Abdominal pain lower                  | 0 | 1 |
| Anaemia of pregnancy                  | 2 | 0 |
| Application site irritation           | 2 | 0 |
| Abdominal discomfort                  | 1 | 0 |
| Acne                                  | 1 | 0 |
| Acute sinusitis                       | 1 | 0 |
| Anxiety                               | 1 | 1 |
| Back pain                             | 1 | 1 |
| Bartholin's abscess                   | 1 | 0 |
| Bile output increased                 | 0 | 1 |
| Bronchitis                            | 0 | 1 |
| Chest discomfort                      | 1 | 1 |
| Chest pain                            | 1 | 0 |
| Cholestasis                           | 1 | 1 |
| Constipation                          | 1 | 1 |
| Crohn's disease                       | 0 | 1 |
| Deep vein thrombosis                  | 1 | 0 |
| Decreased appetite                    | 0 | 1 |



|                                |   |   |
|--------------------------------|---|---|
| Depressed mood                 | 0 | 1 |
| Dermatitis allergic            | 1 | 0 |
| Diarrhoea                      | 1 | 0 |
| Dizziness                      | 1 | 1 |
| Dyspnoea                       | 1 | 1 |
| Ear infection                  | 1 | 0 |
| Eczema                         | 1 | 0 |
| Fatigue                        | 1 | 0 |
| Fluid retention                | 1 | 0 |
| Food poisoning                 | 1 | 0 |
| Gastroenteritis                | 0 | 1 |
| Haemorrhage urinary tract      | 0 | 1 |
| Iron deficiency                | 1 | 0 |
| Kidney infection               | 1 | 0 |
| Ligament injury                | 1 | 1 |
| Mastitis                       | 1 | 0 |
| Mental disorder                | 0 | 1 |
| Mood swings                    | 0 | 1 |
| Mouth ulceration               | 1 | 0 |
| Muscle spasms                  | 0 | 1 |
| Neck pain                      | 1 | 0 |
| Oedema peripheral              | 1 | 0 |
| Oligohydramnios                | 1 | 0 |
| Otitis media acute             | 1 | 0 |
| Pain                           | 0 | 1 |
| Palpitations                   | 0 | 1 |
| Panic attack                   | 1 | 1 |
| Pelvic pain                    | 1 | 0 |
| Peripheral swelling            | 0 | 1 |
| Placenta praevia               | 1 | 0 |
| Post procedural complication   | 0 | 1 |
| Pre-eclampsia                  | 1 | 0 |
| Premature rupture of membranes | 0 | 1 |
| Pulmonary embolism             | 1 | 0 |
| Pyrexia                        | 1 | 0 |
| Rash                           | 0 | 1 |
| Rhesus antibodies              | 0 | 1 |
| Road traffic accident          | 1 | 0 |
| Seasonal allergy               | 1 | 0 |
| Sinusitis                      | 0 | 1 |
| Suicidal ideation              | 0 | 1 |
| Subcutaneous abscess           | 1 | 0 |
| Symphysiolysis                 | 0 | 1 |
| Thrombosis                     | 1 | 0 |
| Tonsillitis                    | 0 | 1 |
| Tooth extraction               | 0 | 1 |
| Tooth fracture                 | 1 | 0 |
| Wheezing                       | 1 | 0 |
| <b>AEs baby</b>                |   |   |
| Acid Reflux                    | 1 | 0 |

|                                             |   |   |
|---------------------------------------------|---|---|
| Bilateral ventriculomegaly                  | 0 | 1 |
| Bronchitis                                  | 1 | 1 |
| Chesty Cough                                | 0 | 1 |
| Cyst, NOS                                   | 0 | 1 |
| Difficulty breathing                        | 0 | 1 |
| Foetal hypokinesia                          | 1 | 0 |
| Infection                                   | 0 | 1 |
| Respiratory distress                        | 0 | 1 |
| Viral infection                             | 1 | 1 |
| <b>ARs potentially related to treatment</b> |   |   |
| Arthralgia                                  | 0 | 1 |
| Asthma                                      | 2 | 0 |
| Dyspepsia                                   | 2 | 0 |
| Eczema                                      | 0 | 1 |
| Functional gastrointestinal disorder        | 0 | 1 |
| Hyperhidrosis                               | 0 | 1 |
| Lip swelling                                | 1 | 0 |
| Muscle swelling                             | 0 | 1 |
| Nightmare                                   | 0 | 1 |
| Stomatitis                                  | 1 | 0 |
| Wheezing                                    | 1 | 0 |

**Supplementary Table 7. Median time to follow-up in the two study arms**

|                                      | E-cigarettes<br>N=505               | NRT<br>N=490                        | Wilcoxon rank<br>sum <sup>#</sup> |
|--------------------------------------|-------------------------------------|-------------------------------------|-----------------------------------|
| Follow-up completed<br>pre-delivery  | -23 days (IQR=-31<br>to -14; N=318) | -23 days (IQR=-31<br>to -16; N=282) | z=-0.4, p=0.68.                   |
| Follow-up completed<br>post-delivery | 16 days (IQR=0 to<br>+66; N=187)    | 10 days (IQR= 0 to<br>+36; N=208)   | z=2.0, p=0.04                     |

# Two-sided p-value

Note 1: 17 participants had no date of delivery recorded and 2 had the date of follow-up missing

Note 2: There were 395 women who answered the follow-up calls only after delivery, 187 (37%) of the EC arm vs 208 (42%) of the NRT arm ( $\chi^2(1)=3.1, p=0.08$ ). Of these women, 12 (6.4%) vs 9 (4.3%) were self-reported abstainers ( $\chi^2(1)=0.85, p=0.36$ ). Among these, 5 (41.7%) vs 3 (33.3%) reported relapsing back to smoking since delivery ( $\chi^2(1)=0.15, p=0.70$ ).

**Supplementary Table 8: Sensitivity analyses of abstinence outcomes counting abstinence only if not accompanied by regular use of non-allocated product**

|                                                     | E-cigarettes<br>(N=571) | NRT<br>(N=569) | RR (95%CI) <sup>#</sup> |
|-----------------------------------------------------|-------------------------|----------------|-------------------------|
| Validated prolonged abstinence at EoP               | 39 (6.8)                | 20 (3.5)       | 1.94 (1.15- 3.29)       |
| Self-reported prolonged abstinence at<br>EoP        | 61 (10.7)               | 31 (5.5)       | 1.96 (1.29-2.97)        |
| Validated point-prevalence abstinence at<br>EoP     | 56 (9.8)                | 29 (5.1)       | 1.92 (1.25-2.97)        |
| Self-reported point-prevalence abstinence<br>at EoP | 112 (19.6)              | 53 (9.3)       | 2.11 (1.55-2.86)        |
| Self-reported abstinence at 4 weeks                 | 88 (15.4)               | 48 (8.4)       | 1.83 (1.31-2.55)        |

# Relative risks obtained using a binomial regression with a logarithmic link with two-sided p-values.

EOP=end of pregnancy
